# Supplementary material
Source: Research Square preprint supplement (doi:10.21203/rs.3.rs-9612173/v1)
Supplement: Supplementary file 2 [file 06367e7268c147cf56231980.docx]

eSupplement 2

1. Relational Playbook and Leadership Coaching Components
2. Relational Playbook Introduction and Chapter 1
3. The NCOD Coaching Curriculum GROW Coaching Framework, Question List & Fidelity Assessment Guide
4. Acceptability, Appropriateness and Feasibility Survey
5. Learning Environment Survey in VHA
6. Intention Survey & Reflection Survey Items
7. Qualitative Interview Guide

Relational Playbook and Leadership Coaching Components

| **Relational Playbook Program** | **Live coaching sessions** |
| --- | --- |
| **Method** | **Method** |
| Monthly self-study of Playbook chapters which include:   - Educational text - Intervention guidance - Peer-reviewed citations - Links to videos, podcasts, and additional resources.   The Playbook curriculum and intervention are hosted on a VA SharePoint housed within the VA firewall and as a 250-page printed document.  Participants are required to implement 2-3 interventions per Chapter. | Video-conference Teams sessions; single leadership coach; session guided by VA National Center for Organization Development Coaching Curriculum Framework |
| **Frequency:** | **Frequency** |
| July: *Baseline Assessment (13-item Learning Environment Assessment Tool; 64-item Learning Environment Survey)*  August: *Chapter 1: Creating a Positive Culture*  September: *Chapter 2: Teamwork*  October: *Chapter 3: Leading Teams*  November: *Chapter 4: Creating Joy in Work*  December: *Chapter 5: Communication and High Reliability*  January: *Post-Intervention Assessment (64-item Learning Environment Assessment, Interviews)* | Six, 60-minute monthly sessions scheduled at participants convenience – Monday-Friday. |
| **Use of Playbook Interventions** | **Use of Coaching Sessions** |
| Source: Qualtrics Reflection Survey:  Chapter 1: 2 of 2 interventions  Chapter 2: 2 of 2 interventions  Chapter 3: 1 of 2 interventions  Chapter 4: 2 of 3 interventions  Chapter 5: 1 of 2 interventions | Source: Coaching Notes  5 cardiology leaders  39 individual sessions  Range 5-6 sessions  Mean 5.6 |

Relational Playbook Introduction and Chapter 1

INSERT PDF

**The NCOD Coaching Curriculum GROW Coaching Framework, Question List & Fidelity Assessment Guide**

The sequence of coaching questions will be guided by four distinct stages. The coach will visit all four stages during coaching sessions. Remember, powerful questions may lead to a long silence. Silence is golden – let people think.

- **G**oal setting for the session as well as the short and long term
- **R**eality checking to explore the current situation
- **O**ptions and alternative strategies or courses of action
- **W**hat is to be done, When, by Whom and the *Will* to do it

**NCOD Coaching Curriculum Question List**

**Goal (small goals are okay – tiny steps can make a huge difference)**

For the conversation

- What would you like to achieve in this conversation?
- We have 60 minutes for this, where would you like to have got to by then?
- If you had a magic wand, where would you like to be at the end of this?

For the issue

- How would you like it to be?
- What outcome are you looking for?
- What is the timeframe?
- Let’s outline a SMART goal (specific, measurable, agreed, realistic, time framed)

**Reality**

- What is happening at the moment?
- How important is this to you?
- On a scale of 1-10, if an ideal situation is 10, what number are you now?
- What actions have you taken so far?
- What other resources are needed?
- Who else is involved/affected?
- What has stopped you from doing more/something else?

**Options**

- What could you do now?
- What ideas do you have? List 10 things – impossible to possible.
- What has worked in the past?
- Who could help you with this?
- How could you improve the situation?
- What choices do you have?

**Will**

Stage 1: Accountability Set-Up – define actions, timeframe, and measures of accomplishment

- What will you do?
- How will you do that?
- When will you do it?
- What is the first step?
- What obstacles might you meet along the way?
- How committed are you to this action, on a scale of 1-10? What prevents it from being a 10?

Stage 2: Follow-up and Feedback – review how things went and explore feedback for learning

- How is it going?
- What did you learn?
- How will you use this in the future?

Acceptability, Appropriateness and Feasibility of Relational Playbook Measure

The Acceptability, Appropriateness and Feasibility Survey measures by Weiner et al, (2017) are associated with adoption of evidence-based practices The measures are defined as:

- **Acceptability** = The perception among stakeholders that the [Playbook + coaching] is agreeable or satisfactory
- **Appropriateness** = The perceived fit, relevance, or compatibility of the [Playbook + coaching] for [Cardiology Teams] and to address [the lack of relationship and communication education and practices for healthcare teams]
- **Feasibility** = The extent to which the [Playbook + coaching] can be successfully used or carried out with [Cardiology Teams]

Weiner, B. J., Lewis, C. C., Stanick, C., Powell, B. J., Dorsey, C. N., Clary, A. S., ... & Halko, H. (2017). Psychometric assessment of three newly developed implementation outcome measures. *Implementation Science*, *12*(1), 1-12.

|  | Completely disagree | Disagree | Neither agree nor disagree | Agree | Completely agree |
| --- | --- | --- | --- | --- | --- |
| 1. The Relational Playbook meets my approval. | ➀ | ➁ | ➂ | ➃ | ➄ |
| 2. The Relational Playbook is appealing to me. | ➀ | ➁ | ➂ | ➃ | ➄ |
| 3. I like the Relational Playbook. | ➀ | ➁ | ➂ | ➃ | ➄ |
| 4. I welcome the Relational Playbook. | ➀ | ➁ | ➂ | ➃ | ➄ |

**Appropriateness of Relational Playbook**

|  | Completely disagree | Disagree | Neither agree nor disagree | Agree | Completely agree |
| --- | --- | --- | --- | --- | --- |
| 1. The Relational Playbook seems fitting. | ➀ | ➁ | ➂ | ➃ | ➄ |
| 2. The Relational Playbook seems suitable. | ➀ | ➁ | ➂ | ➃ | ➄ |
| 3. The Relational Playbook seems applicable. | ➀ | ➁ | ➂ | ➃ | ➄ |
| 4. The Relational Playbook seems like a good match. | ➀ | ➁ | ➂ | ➃ | ➄ |

**Feasibility of Intervention Measure**

|  | Completely disagree | Disagree | Neither agree nor disagree | Agree | Completely agree |
| --- | --- | --- | --- | --- | --- |
| 1. The Relational Playbook seems implementable. | ➀ | ➁ | ➂ | ➃ | ➄ |
| 2. The Relational Playbook seems possible. | ➀ | ➁ | ➂ | ➃ | ➄ |
| 3. The Relational Playbook seems doable. | ➀ | ➁ | ➂ | ➃ | ➄ |
| 4. The Relational Playbook seems easy to use. | ➀ | ➁ | ➂ | ➃ | ➄ |

Please provide any comments or suggestions to improve the acceptability, appropriateness, or feasibility of the Relational Playbook (open text option)

**Demographic Questions:**

1. How many years have you been in the VA?
2. Role
3. Age
4. Gender
5. Race Ethnicity

**Appendix 8: Learning Environment Survey in VA Cardiac Cath Labs**

**For each of the following questions please refer to the cath lab you worked in during the past six months. All questions in this survey will refer to this cath lab.**

| **Highly Inaccurate (1) – Moderately Accurate (2) – Slightly Accurate (3) – Neither Accurate nor Inaccurate (4) – Slightly Accurate (5) – Moderately Accurate (6) – Highly Accurate (7)** | |
| --- | --- |
| ***Supportive Learning Environment*** | |
| 1 | In this cath lab, people value new ideas. |
| 2 | Differences in opinions are welcomed in this cath lab. |
| 3 | This cath lab engages in productive conflict and debate during discussions. |
| 4 | In this cath lab, people are open to alternative ways of getting work done. |
| 5 | People in this cath lab are eager to share information about what doesn't work as well as about what does work. |
| 6 | In this cath lab, we frequently identify and discuss underlying assumptions that might affect key decisions. |
| 7 | If you make a mistake in this cath lab, it is often held against you. |
| ***Experimentation*** | |
| 8 | This cath lab experiments frequently with new product/service offerings. |
| 9 | This cath lab experiments frequently with new ways of working. |
| 10 | This cath lab frequently employs pilot projects or simulations when trying out new ideas. |
| 11 | This cath lab has a formal process for conducting and evaluating experiments or new ideas. |
| ***Time for Reflection*** | |
| 12 | There is simply no time for reflection in this cath lab. |
| 13 | In this cath lab, people are too busy to invest time in improvement. |
| ***Training*** | |
| 14 | Experienced employees in this cath lab receive training when switching to a new position. |
| 15 | Experienced employees in this cath lab receive training when new initiatives are launched. |
| 16 | Newly hired employees in this cath lab receive adequate training. |
| ***Information Transfer*** | |
| 17 | This cath lab has forums for meeting with and learning from experts from **outside the organization.** |
| 18 | This cath lab has forums for meeting with and learning from experts from **other departments / teams / divisions.** |
| 19 | This cath lab has forums for meeting with and learning from **customers / clients**. |
| 20 | This cath lab regularly conducts post-audits, after-action reviews and debriefings. |
| ***Information Collection*** | |
| 21 | This cath lab frequently compares its performance to **best-in-class organizations**. |
| 22 | This cath lab frequently compares its performance to **other similar work groups.** |
| 23 | This cath lab systematically collects information on technological trends. |

| ***Never (1) - Infrequently (2) – Sometimes (3) – Often (4) – Always (5)*** | |
| --- | --- |
| ***Management that Reinforces Learning*** | |
| 24 | My immediate supervisor(s) establish(es) forums for and provide(s) time and resources for identifying problems and organizational challenges. |
| 25 | My immediate supervisor(s) establish(es) forums for and provide(s) time and resources for reflecting and improving on past performance. |
| 26 | My immediate supervisor(s) listen(s) attentively. |
| 27 | My immediate supervisor(s) invite(s) input from others in discussions. |

| ***Not at all (1) – To a Very Limited Extend (2) – To a Limited Extend (3) – To a Moderate Extend (4) – To a Considerable Extent (5) – To a Great Extent (6) – To a Very Great Extent (7****)* | | |
| --- | --- | --- |
| ***Reliability Enhancing Work Practices*** | | |
| ***28*** | Employees are hired based on their willingness to learn new skills. | |
| ***29*** | Employees are hired based on their ability to work with others. | |
| ***30*** | Employees are hired based on their ability to communicate. | |
| ***31*** | We have a preceptor program for newly hired employees. | |
| ***32*** | We provide employees with training in communication and interpersonal skills. | |
| ***33*** | We regularly supplement formal training sessions with informal discussion on the unit. | |
| ***34*** | Employees are provided the opportunity to suggest improvements in the way things are done. | |
| **35** | Employees control their own practice. | |
| ***36*** | Employees regularly participate in decisions that affect their work. | |
| ***37*** | Employees participate in decision making over care-delivery practices. | |
| ***Mindful Organizing*** | | |
| **38** | | My workgroup has a good understanding of each other’s talents and skills. |
| **39** | | My workgroup talks about mistakes and ways to learn from them. |
| **40** | | Members of my workgroup discuss our unique skills with each other so we know who on the unit has relevant specialized skills and knowledge. |
| **41** | | My workgroup discusses alternatives as to how we go about our normal work activities. |
| **42** | | When giving report to another caregiver, we usually discuss what to look out for. |
| **43** | | When attempting to resolve a problem, we take advantage of the unique skills of our colleagues. |
| **44** | | My workgroup spends time identifying activities we do not want to go wrong. |
| **45** | | When errors happen, we discuss how we could have prevented them. |
| **46** | | When a patient crisis occurs, we rapidly pool our collective expertise to attempt to resolve it. |
| ***Respectful Interaction*** | | |
| **47** | | We honestly report what we perceive to each other |
| **48** | | We demonstrate a great deal of mutual respect for each other. |
| **49** | | When discussing patient information, we attempt to integrate our interpretations without belittling our own opinions or another employee’s |
| **50** | | The employees in this workgroup are trustworthy. |
| ***Affective Commitment*** | | |
| **51** | | My workgroup has a great deal of personal meaning for me. |
| **52** | | I feel emotionally attached to my current workgroup. |
| **53** | | I do not feel a strong sense of belonging to my workgroup. (reverse scored) |
| ***Organizational Citizenship Behaviors*** | | |
| **53** | | The employees in this workgroup always do more than they are expected to do. |
| **55** | | The employees in this workgroup help make others more productive. |
| **56** | | The employees in this workgroup willingly help others who have work-related problems. |
| **57** | | The employees in this workgroup try to make the best of the situation, even when there are problems. |
| **58** | | The employees in this workgroup are always ready to lend a helping hand to each other. |
| **59** | | The employees in this workgroup can tolerate occasional inconveniences when they arise. |

| **Employee Engagement, Safety Climate Questions** | | |
| --- | --- | --- |
| **60** | Considering everything, how satisfied are you with your job? | Very dissatisfied to very satisfied (5-point Likert) |
| **61** | I feel burned out from my work | Never to every day (7-point Likert) |
| **62** | If I were able, I would leave my current job | Strongly disagree to Do Not Know (6-point Likert) |
| **63** | We have had ____cath lab staff leave in the last 12 months | Choose one: 0; 1-2; 4-6; 7+ |
| **64** | I would feel perfectly safe being treated in this cath lab | Strongly disagree to Do Not Know (6-point Likert) |

| **Demographic Survey Data** | **Categories** |
| --- | --- |
| Unique ID | A confidential unique ID will be assigned to each employee that will be linked to their email address and cath lab site |
| Role | 1: Registered Nurse; 2: Physician; 3: Technician; 4: Other (specify) |
| Position | 1: Supervisor/Manager; 2: No supervisory role |
| Highest educational degree earned | 1: High school diploma; 2: One-year technical; 3: Associates degree; 4: Bachelor’s degree; 5: Master’s degree 6: Doctorate; 7: Doctor of medicine |
| Age range | Continuous |
| Gender | 1: Male; 2: Female |
| Race | 1: American Indian or Alaskan Native; 2: Asian or Pacific Islander; 3: Black; 4: White; 5: Other (specify) |
| Ethnicity | 1: Hispanic origin; 2: Not of Hispanic Origin |
| How many years have you been working in healthcare | Continuous |
| How many years in the VA | Continuous |
| How many years in this cath lab | Continuous |

**Intention Survey Item**

*“This week I will... (e.g. use the end of shift handoff/huddle to practice appreciative inquiry”.*

**Reflection Survey Items**

**Were you able to implement any Playbook interventions this week?**

- Yes
- No because... (e.g., I was out of office, did not have time, no meetings scheduled, etc.) __________________________________________________

Skip To: Q9 If Were you able to implement any Playbook interventions this week? = No because... (e.g., I was out of office, did not have time, no meetings scheduled, etc.)

**Which Playbook practices were implemented this week?** (Check all that apply)

Chapter 1: Creating a Positive Culture

- Three Good Things Practice (in: Creating a Positive Culture Section)
- Appreciative Inquiry Questions (in: Appreciative Inquiry Section)
- Additional Chapter Interventions: __________________________________________________

Chapter 2: Teamwork

- Walk in my Shoes (in: Building a Team Section)
- Ice Breaker Questions (in: Relationships at Work Section)
- Additional Chapter Interventions: __________________________________________________

Chapter 3: Leading Teams

- Stop, Start, Continue (in: Essential Leader Skills Section)
- Situation, Behavior, Impact (in: Essential Leader Skills Section)
- Additional Chapter Interventions: __________________________________________________

Chapter 4: Creating Joy in Work

- Understanding What Matters (in: Joy and Happiness Section)
- Was it Worth It? (in: Joy and Happiness Section)
- Gratitude Huddle (in: Gratitude Section)
- Additional Chapter Interventions: __________________________________________________

Chapter 5: Communication & High Reliability

- Start of Day Huddles (in: Huddles & Debriefs Section)
- Daily Debriefs (in: Huddles & Debriefs Section)
- Additional Chapter Interventions: __________________________________________________

**Did you adapt a Playbook intervention to fit your team/context this week?**

- Yes, in the following way... __________________________________________________
- No

**How much time did you spend implementing Playbook interventions this week?**

- None
- 30 minutes or less
- 60 minutes or less
- 1-2 hours
- 3 or more hours

**How are things going? Do you have any stories to share?**

________________________________________________________________

________________________________________________________________

________________________________________________________________

________________________________________________________________

________________________________________________________________

**Qualitative Interview Guide**

1. Please tell me about your role in the cardiac catheterization lab.
2. Please tell me about your experience being part of the Relational Playbook trial.
3. Did you implement any Relational Playbook practices over the course of the pilot study? If needed, please open the Playbook SharePoint site.
   1. Probes:
      1. Can you please describe one or two of the practices that you implemented?
         1. About how long did it take you to implement this practice after receiving the playbook?
      2. How did you introduce it to your team?
      3. What was the process and discussion amongst the team about the practice?
      4. How was it rolled out?
      5. Were any changes (adaptations) made from what was outlined in the Playbook?
         1. Why did you make this change? What was the impact of the change?
4. Can you describe how one of the Playbook interventions was integrated into the flow of work?
   1. Probe:
      1. How long did it take for this intervention to be integrated into practice?
      2. Are you still using the intervention?
      3. What was the impact (both positive and negative)?
5. Can you please describe how different team members were involved in implementing practices from the Relational Playbook? [adoption, reach]
   1. Probe:
      1. Physicians and fellows?
      2. Other staff that you manage or supervise?
6. Did anything make it easier to implement the Playbook practices within your team?
7. Did anything make it more challenging to implement the Playbook practices within your team?
8. How easy was it to use the Relational Playbook practices?
   1. What made it easier to use the practices?
   2. What made it more difficult to use the practices?
9. Can you describe how implementing changes from the Relational Playbook affected your team, workflow or quality improvement goals?
   - 1. [if needed] Were there any unintended consequences?
10. If randomized to the leadership coaching: can you please tell me about your experience with leadership coaching?
    1. How easy was it for you to participate in coaching?
    2. What aspects of the coaching supported your personal growth and development? What aspects were most challenging?
    3. Please provide a specific example of how you used the knowledge gained from coaching to change the way you lead your team?
    4. How did coaching impact your implementation of the Relational Playbook?
    5. [if needed] Did coaching facilitate (or hinder) Playbook implementation in any way?
11. [if not coached by Dr. Gilmartin] How do you think coaching would have impacted your growth and development?
    1. How do you think coaching would have impacted your implementation of the Relational Playbook?
12. Can you tell me which elements of the Relational Playbook (or specific practices) you and your team continue to use?
13. How do plan to bring new people into the supportive learning environment you created through the Playbook practices?
14. How do you plan to sustain the positive changes for your team?
15. What would you like to share with other cath lab managers thinking about implementing the Relational Playbook practices?
16. Is there anything else you would like to tell me about participating in the Relational Playbook intervention?
    1. Probe: Intention and reflection surveys
    2. Evaluation surveys
17. Demographic questions:
    1. On average, how much time each week did you spend on the Playbook trial? [cost]
    2. What is your Nursing Scale so we can estimate the costs, in your time, of participating in the trial? [cost]
