# Supplementary material
Source: Research Square preprint supplement (doi:10.21203/rs.3.rs-9612173/v1)
Supplement: Supplementary file 4 [file c4fe26c713eeb7caa83775a7.docx]

**eSupplement 3**

1. eTable1: Pre Post Learning Environment Survey Results
2. eTable 2: Qualitative Interview Participant Demographic Table

**eTable 1. Pre-Post Learning Environment Survey Responses - Unadjusted Mean LES Factor Scores**

|  | Pre  Control (N=25) | Post Control (N=11) | Pre Intervention (N=16) | Post Intervention (N=9) | Total (N=61) |
| --- | --- | --- | --- | --- | --- |
| **Supportive Learning Environment (SLE)** |  |  |  |  |  |
| Mean (SD) | 4.4 (1.3) | 4.1 (1.5) | 4.5 (1.8) | 6.2 (1.0) | 4.6 (1.6) |
| **SLE: Experimentation** |  |  |  |  |  |
| Mean (SD) | 4.1 (1.6) | 3.8 (1.3) | 4.1 (1.6) | 5.2 (1.0) | 4.2 (1.5) |
| **SLE: Time for Reflection** |  |  |  |  |  |
| Mean (SD) | 3.1 (1.8) | 2.9 (1.3) | 2.6 (1.5) | 2.0 (1.0) | 2.8 (1.6) |
| **SLE: Training** |  |  |  |  |  |
| Mean (SD) | 5.2 (1.7) | 5.3 (1.4) | 4.6 (1.9) | 6.2 (1.2) | 5.2 (1.7) |
| **SLE: Information Transfer** |  |  |  |  |  |
| Mean (SD) | 3.9 (1.6) | 4.2 (1.2) | 3.7 (1.6) | 5.1 (1.9) | 4.1 (1.6) |
| **SLE: Information Collection** |  |  |  |  |  |
| Mean (SD) | 4.0 (1.8) | 4.2 (1.5) | 3.7 (1.9) | 5.2 (2.1) | 4.1 (1.8) |
| **SLE: Information Collection** |  |  |  |  |  |
| Mean (SD) | 3.9 (1.0) | 4.0 (0.7) | 3.5 (1.0) | 4.5 (0.8) | 3.9 (1.0) |
| **Reliability Enhancing Work Practices (REWP)** |  |  |  |  |  |
| Mean (SD) | 4.3 (1.6) | 3.9 (1.4) | 4.2 (1.2) | 5.9 (0.9) | 4.4 (1.5) |
| **REWP: Mindful Organizing** |  |  |  |  |  |
| Mean (SD) | 4.8 (1.6) | 4.1 (1.2) | 4.3 (1.5) | 6.1 (1.1) | 4.8 (1.6) |
| **REWP: Respectful Interaction** |  |  |  |  |  |
| Mean (SD) | 3.9 (1.6) | 2.9 (1.6) | 4.2 (1.4) | 5.8 (1.2) | 4.1 (1.7) |
| **REWP: Affective Commitment** |  |  |  |  |  |
| Mean (SD) | 4.2 (1.4) | 4.6 (1.6) | 4.7 (1.6) | 6.1 (1.0) | 4.7 (1.5) |
| **REWP: Organizational Citizenship** |  |  |  |  |  |
| Mean (SD) | 4.0 (1.8) | 3.2 (1.7) | 4.3 (1.4) | 5.9 (0.9) | 4.2 (1.7) |

Note. Unadjusted mean (SD) LES factor scores, stratified by intervention status + timepoint (i.e. pre vs post intervention).

**eTable 2. Qualitative Interview Participant Demographic Table**

| **Group Study ID** | **Role** | **Region** | **Gender** | | | **Age** |
| --- | --- | --- | --- | --- | --- | --- |
| Intervention 1 | Nurse | Southwest | | F | 46-50 | |
| Intervention 2 | Technician | North Central | | F | 51-55 | |
| Intervention 3 | Nurse | Mountain West | | F | 56-60 | |
| Control 1 | Nurse | Northeast | | F | 46-50 | |
| Control 2 | Nurse | South | | F | 56-60 | |
| Control 3 | Nurse | Southeast | | F | 41-45 | |
